# Supplementary material for: Assessment of crop yield losses in Punjab and Haryana using 2 years of continuous in situ ozone measurements
Source: Copernicus journal article supplement (doi:10.5194/acp-15-9555-2015), 2015-08-27
Supplement: Supplementary file 1 [file acp-15-9555-2015-supplement.zip]

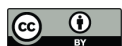

## *Supplement of*

# **Assessment of crop yield losses in Punjab and Haryana using 2 years of continuous in situ ozone measurements**

**B. Sinha et al.**

*Correspondence to:* B. Sinha ([bsinha@iisermohali.ac.in](mailto:bsinha@iisermohali.ac.in))

- [acp-15-9555-2015-supplement-title-page.pdf](#)
- Supplement
  - [acp-2014-798 - Supplement.log](#)
  - [acp-2014-798 - Supplement.pdf](#)
  - [acp-2014-798 - Supplement.tex](#)
  - [acp-2014-798 - Supplementary table.xlsx](#)

The copyright of individual parts of the supplement might differ from the CC-BY 3.0 licence.
